# Supplementary material
Source: HighWire-hosted journal article supplement (https://bmjopen.bmj.com/content/9/3/e024058)
Supplement: inline-supplementary-material-1 [file inline-supplementary-material-1.pdf]

## TOPIC GUIDE: Current patient / carer for current patient

### 1. Let's find out about you.

Age  
Employment  
Education – school / university / postgraduate  
Social support structures & marital status  
Ethnicity

### 2. Why are you in hospital now?

Current diagnosis  
Other conditions  
Approximate length of stay to date  
    < 1 day  
    1 – 5 days  
    5 – 10 days  
    > 10 days

### 3. How many times have you been admitted to hospital in the last 6 months?

1-5  
5-10  
>10

### 4. Do you always come to this hospital or have you been admitted to other local hospitals?

### 5. How do you know if you're on a good ward? What is a 'good ward' to you?

Environment

- Clean
- Quiet
- Toilet and shower are available when required
- Meal timeliness, warmth
- Help available when requested
- Staff are responsiveness to my needs / my family's needs

Welcome

- My arrival is expected
- Staff introduce themselves
- Staff make me feel I will be well looked after; show a caring attitude; and don't rush me

Communication and use of personal information

- Accurate knowledge of previous medical history / current diagnosis / current investigations / discharge plan / medication reconciliation
- Quality of communication / teamwork

Discharge preparation

Friends' / families' recommendations

Ward information boards / quality and safety boards

Ward information leaflets / other printed materials.

Ward information displays / electronic screens

**6. If you had to decide whether a ward was good or not, what information would you need to make that decision?**

**7. Have you noticed any of the information the ward displays about itself? What do you think of the information you've seen?**

Friends and family test results

Safety cross

Shift-by-shift staffing

Falls

Pressure ulcers

Safety thermometer / harm-free care

Venous thromboembolism prophylaxis

Hand hygiene compliance

Hospital-acquired infections

Infection rates

Incident reporting

**8. What would you like to know about how your ward is performing?**

Hand hygiene compliance

Staffing levels

Friends and family results

Hospital-acquired infections

Pressure Ulcers

Falls

Venous thromboembolism prophylaxis

Complaints

Compliments

Length of stay

Mortality

Readmission rate

Safety climate

**9. How should your ward make that information available to you and your family??**

Ward displays

Leaflets

Smartphone / other device

Webpage

## 10. Preference for information seeking

Information-seeking sub-scale

|                                                                                                 | Disagree<br>strongly | Disagree<br>slightly | Neutral | Agree<br>slightly | Agree<br>strongly |
|-------------------------------------------------------------------------------------------------|----------------------|----------------------|---------|-------------------|-------------------|
| As you become sicker you should be told more and more about your illness                        |                      |                      |         |                   |                   |
| You should understand completely what is happening inside your body as a result of your illness |                      |                      |         |                   |                   |
| Even if the news is bad, you should be well informed                                            |                      |                      |         |                   |                   |
| Your doctor should explain the purpose of your laboratory tests                                 |                      |                      |         |                   |                   |
| It is important for you to know all the side effects of your medication                         |                      |                      |         |                   |                   |
| Information about your illness is as important to you as treatment                              |                      |                      |         |                   |                   |
| When there is more than one method to treat a problem, you should be told about each one        |                      |                      |         |                   |                   |

**11. Have you previously had to complain about care or healthcare staff, nurses or doctors? What made you complain? How? PALS / informally / in writing?**

Ward:

Weekly Audit Scores

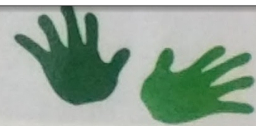

Cleaning Audit: 99.14%

Date of audit: 12/02/2016

Hand Hygiene Audit : 100%

Date of audit:

\_\_\_\_\_|\_\_\_\_\_|\_\_\_\_\_



Ward: [REDACTED]  
Patient Safety Information

Our last  
pressure ulcer  
(graded 1-4)  
was on:

JULY  
2015

Our last patient  
fall was on:

23.9.2015

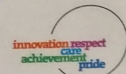

Ward: [REDACTED]  
Infection Control Information

Our last  
incidence of  
MRSA was on:

25.05.14

Our last  
incidence of  
C.Diff was on:

15.12.14

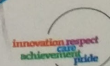



## I-Staff Safe Staffing Information Board

The Nurse in Charge today is:

Staffing Status

Current Shift

DATE:

15-2-15

Registered Nurses

Healthcare  
Assistants

Additional Support  
(for e.g. specials)

Staff required

1  
3

On duty

1  
1

2

2

### Roles and Responsibilities

|                        | Responsibilities                                                                         |
|------------------------|------------------------------------------------------------------------------------------|
| Nurse in Charge        | Provides supervision, management and direct clinical care                                |
| Registered Nurses      | Provides direct clinical care and supervision                                            |
| Health Care Assistants | Provides direct care under the supervision of a registered nurse                         |
| Additional Support     | Specials ( may be registered or unregistered providing 121 direct care with supervision) |

If you have any queries about the staffing on this ward please speak to the Nurse in Charge
